# 1 **Characterizing patient details-related challenges** 2 **from health information technology-related** 3 **incident reports from Swedish healthcare**

4

5

6 <sup>1,2</sup>Md Shafiqur Rahman Jabin

7 <sup>1</sup>Ding Pan

8 <sup>1</sup>Evalill Nilsson

9

10

11

12 <sup>1</sup> Faculty of Health and Life Sciences, Linnaeus University

13 <sup>2</sup> Faculty of Health Studies, University of Bradford

14

15

16 \* Corresponding Author

17

18 Email: [mdshafiqur.rahmanjabin@lnu.se](mailto:mdshafiqur.rahmanjabin@lnu.se)

19 [mjabin@bradford.ac.uk](mailto:mjabin@bradford.ac.uk) (MSRJ)

20

21

22

23 MSRJ, EN, and DP researched literature, obtained ethical advice, and performed data analysis.

24 MSRJ was involved in protocol development and writing the drafts of the manuscript. Both

25 MSRJ and EN reviewed and edited the manuscript and approved the final version of the

26 manuscript.

27

## 28 **Abstract**

29 This study examined health information technology-related (HIT) incidents to identify patient  
30 details-related issues, their association with contributing factors, and outcomes. Sources of  
31 information comprised retrospectively collected incident reports (n=95) using two sampling  
32 methods, i.e., purposive and snowball sampling. The reports were collected in two formats –  
33 interviews (written and telephone) and/or a set of already existing reports from the local  
34 database. The incident reports were analyzed using both the inductive method (thematic  
35 analysis) and the deductive approach using an existing framework, i.e., the International  
36 Classification for Patient Safety. The studies identified 90 incidents with 120 patient details-  
37 related issues—categorized as either information-related (48%) or documentation-related  
38 (52%) problems; around two-thirds of the 120 issues were characterized by human factors. Of  
39 the total sample, 87 contributing factors were identified, of which "medical device/system"  
40 (45%) and "documentation" (20%) were the most common contributing factors. Of 90  
41 incidents, more than half (59%) comprised patient-related outcomes—patient inconvenience  
42 (47%) and patient harm (12%) and the remaining 41% (n=37) included staff or organization-  
43 related outcomes. The study confirms that patient details-related problems with HIT systems  
44 were more likely to affect patient care delivery – more than half of the incidents resulted in  
45 patient-related outcomes, namely patient inconvenience and patient harm, including disease  
46 risks, severe health deterioration, injury, and even patient death. Incidents associated with  
47 patient details can cause deleterious effects; therefore, characterizing them should be a routine  
48 part of clinical practice to improve the constantly changing healthcare system.

## 49 **Author Summary**

50 The rapid advances in HIT systems have made healthcare a truly complex socio-technical  
51 system than ever before. No matter what changes are introduced in healthcare, new, unforeseen

52 problems always arise. Our research focuses on improving the already existing HIT systems  
53 and the care delivery around those systems by solving the clinical problems we encounter in  
54 our day-to-day clinical practice rather than building new technologies. The foundation builds  
55 on collecting and analyzing incident reports to illuminate the current challenges of Swedish  
56 digital healthcare systems and provide a basis for preventive and corrective strategies, thus  
57 improving clinical practice. Although a host of mainly technical problems was expected, around  
58 two-thirds of the issues were identified to be generated by failures due to human factors.  
59 Therefore, several strategies to mitigate these risks can be implemented, such as training  
60 healthcare professionals before integrating new HIT systems and designing out the "error-prone  
61 features". Our study provided insight into patient information/documentation-related problems  
62 associated with HIT systems and how human and technical factors affect patient care delivery.  
63 The analyses may also help the reporters and analysts regarding where preventive and  
64 corrective strategies should be addressed to improve the constantly changing healthcare system.

## 65 **Introduction**

66 It is evident that Health Information Technology (HIT)-related interventions create viable and  
67 timely opportunities to improve accuracy and efficiency in modern medicine (1-3). However, a  
68 survey of a nationally representative sample of medical group practices in the US suggested  
69 that adopting HIT, such as Electronic Health Record (EHR), is slow and complex and requires  
70 a great deal of support (4).

71  
72 There is ample evidence that patient details can go awry; for example, inflexible electronic  
73 forms can result in incorrect orders (5), inaccurate medication requests from a medication  
74 ordering system (6), or lost patient data in the EHR system (7). Data entry errors caused by the  
75 user can result in incorrect or outdated information remaining in the system and reproducing  
76 the same error at several stages of the procedure (8, 9). Healthcare professionals can also delay

77 patient information entry due to their busy schedules or frequent interruptions, resulting in  
78 outdated or incomplete information for a more extended period (9). 'Patient details', in this  
79 context, refer to information-and-documentation-related features of the patient, i.e., any patient  
80 information in a healthcare facility is recorded as a document, either in paper or electronic form.  
81 For instance, patient demographics and clinical outcomes are usually stored electronically in  
82 the health or medical record. Therefore, a record of any patient information has been considered  
83 patient details throughout this study.

84  
85 Several barriers were identified in a recent study by Bjerkan et al. that negatively impacted the  
86 nursing practices' documentation process, including individual, social, organizational, and  
87 technological factors (10). It was also reported that healthcare professionals found the process  
88 of electronic-record documentation to be onerous, as such records contain too much information  
89 (11).

90  
91 Jabin et al. demonstrated in 2019 that HIT-related incidents occur at each step of the medical  
92 imaging workflow process and that human and technical factors play a role in problems related  
93 to patient details (12). The human factor involves interactions among humans and other  
94 elements of a system, optimizing human well-being and overall system achievement (13). On  
95 the other hand, the technical factor refers to the attributes of practices and devices/systems that  
96 can influence the performance of an organization (14).

97  
98 The Swedish Medical Products Agency (MPA) aims to deliver, accord, and contribute to  
99 improved healthcare in collaboration with the Swedish eHealth Agency and the Swedish  
100 Authority for Privacy Protection. The healthcare providers were recommended to strengthen  
101 process measurement and provide leadership to reduce the risks associated with HIT systems

102 (15). Moreover, all Swedish county councils have established computerized reporting systems  
103 to which any healthcare practitioner can submit incident reports (16).

104 According to Magrabi et al., incident reports could be one source among a range of information  
105 repositories (16). Reports of HIT-related incidents indicate the gap between the expected and  
106 empirically-supported HIT advances; therefore, continuous incident reports and analysis could  
107 bridge the gap (12, 17-19). An integrated framework for safety, quality, and risk management,  
108 including incident management and information system, was proposed by Runciman et al. (20).  
109 The concepts and terms were established in the form of the International Classification for  
110 Patient Safety (ICPS)—classification of incident reports and measurement of safety (21). The  
111 ICPS helps collect and analyze incident reports to understand what went wrong and how it went  
112 wrong.

113 The incident reports generally consist of information regarding the circumstances surrounding  
114 the incidents (type of incident), such as what contributed to these events occurring and their  
115 outcomes. "Incident type is a descriptive term for a category made up of incidents of a common  
116 nature grouped because of shared, agreed features" (21). One incident may be classified into  
117 more than one type of issue, for example, information-related issues and documentation-related  
118 issues. Information-related issues may reflect on patient information or characteristics, for  
119 example, the reason for seeking care, primary diagnosis, and patient status (12, 22). The  
120 document-related issues may include any written, typed, drawn, stamped, or printed text or any  
121 document where patient information has been entered. Documents may include nursing medical  
122 records, protocols or policies, patient labels, stickers, requests, reports, and medical images (12,  
123 22).

124

125 According to the ICPS, "contributing factors are the circumstances, actions or influences which  
126 are thought to have played a part in the origin or development of an incident or to increase the  
127 risk of an incident" (21). It is notable that an incident may have more than one contributing  
128 factor, and one incident may be a contributing factor to another incident (a "recursive" model).  
129 "Patient outcome relates to the impact upon a patient which is wholly or partially attributable  
130 to an incident" (21). On the other hand, "organizational outcomes" refer to the impacts upon an  
131 organization which is wholly or partially attributable to an incident" (21). However, readers  
132 interested in the conceptual framework, key concepts, terms, and definitions of the 'classes'  
133 comprising the ICPS may follow a series of articles published by the World Health Organization  
134 with the formation of the World Alliance for Patient Safety. Three scientific papers were  
135 published in 2009, with the result of the work developed using a two-stage Delphi survey,  
136 participated by 300 experts from a range of fields (21, 23, 24).

137 The thematic analyses and deductive approaches of the ICPS (25) are suitable for analyzing and  
138 interpreting HIT incidents in Swedish healthcare. Since little research has been conducted that  
139 has focused on issues related to patient details reported in HIT incidents, there is a need for  
140 qualitative analysis, both deductive and inductive. This will help explore the challenges related  
141 to patient details (information and documentation) that arise in routine clinical practice in  
142 Swedish healthcare.

143 The overall aim of this study was to explore HIT-related incidents and identify patient details-  
144 related problems, as well as their association with human and technical factors, using thematic  
145 analysis. The study also examines each HIT incident's contributing factors and outcome using  
146 the ICPS. This paper explores the following research questions:

- 147 1. What patient details-related issues occur in the routine clinical practice of Swedish  
148 healthcare?

- 149 2. How are these problems associated with human and technical factors?  
150 3. What are the other contributing factors and outcomes of these patient details-related  
151 issues?

## 152 **Methods**

### 153 **Data collection**

154 Initially, a list of 55 participants was made using purposive sampling, covering 21 regions of  
155 Sweden, targeting physicians, nurses, medical engineers, and healthcare quality managers. Of  
156 the 55 participants contacted, only five responses were received. Due to this low response,  
157 additional 19 participants were approached using snowball sampling, of which 15 responses  
158 were collected. The incident reports were collected in two formats depending on the availability  
159 and accessibility of the participants. The participants were requested either to participate in  
160 interviews (written and telephone) and/or provide a set of retrospectively collected incident  
161 reports from their local database.

162  
163 From the 15 responders, 98 incident reports were collected, three of which were excluded either  
164 due to lack of adequate information or inability to categorize it as a HIT incident. The final  
165 sample of 95 retrospectively collected HIT incident reports from Swedish healthcare was  
166 considered for identifying patient details-related problems and their association with human  
167 and technical factors. A detailed description of the participant characteristics from each region,  
168 the number of incidents collected, and the time interval of collected incidents are presented in  
169 Table 1 (26).

170  
171 *Table 1 Participant and incident characteristics*

| Participant Characteristics |            | Region | No. of incidents collected from |                      |                   |       | Time period of incidents |
|-----------------------------|------------|--------|---------------------------------|----------------------|-------------------|-------|--------------------------|
| No.                         | Occupation |        | Written response                | Telephone interviews | Existing database | Total |                          |

|    |                               |           |   |   |    |           |                   |
|----|-------------------------------|-----------|---|---|----|-----------|-------------------|
| 1  | Quality manager <sup>1</sup>  | Kalmar    | 1 |   | 26 | 27        | 01/2016 – 04/2021 |
| 2  | Quality Manager <sup>2</sup>  | Kronoberg | 1 |   | 0  | 1         | 03/2021           |
| 3  | Quality Manager <sup>3</sup>  | Uppsala   | 0 |   | 38 | 38        | 06/2019 – 06/2021 |
| 4  | Medical Engineer <sup>1</sup> | Kalmar    | 1 |   | 0  | 1         | 03/2021           |
| 5  | Medical Engineer <sup>2</sup> | Kronoberg | 1 |   | 0  | 1         | 03/2021           |
| 6  | Medical Engineer <sup>3</sup> | Gävle     | 0 | 2 | 14 | 16        | 03/2020 – 04/2021 |
| 7  | Medical Engineer <sup>4</sup> | Gävle     | 0 | 3 | 0  | 3         | 05/2021           |
| 8  | Physician <sup>1</sup>        | Kalmar    | 1 |   | 0  | 1         | 04/2021           |
| 9  | Physician <sup>2</sup>        | Kronobeg  | 1 |   | 0  | 1         | 04/2021           |
| 10 | Physician <sup>3</sup>        | Kronobeg  | 2 |   | 0  | 2         | 04/2021           |
| 11 | Physician <sup>4</sup>        | Kronobeg  | 2 |   | 0  | 2         | 04/2021           |
| 12 | Physician <sup>5</sup>        | Kronobeg  | 2 |   | 0  | 2         | 04/2021           |
| 13 | Physician <sup>6</sup>        | Stockholm | 1 |   | 0  | 1         | 04/2021           |
| 14 | Nurse <sup>1</sup>            | Stockholm | 1 |   | 0  | 1         | 03/2021           |
| 15 | Nurse <sup>2</sup>            | Stockholm | 1 |   | 0  | 1         | 04/2021           |
|    | <b>Grand total</b>            |           |   |   |    | <b>98</b> |                   |

## 172 Data analysis

173 Incident reports (in the form of free-text narratives) were analyzed using both inductive and  
 174 deductive methods in order to extract detailed information. The inductive approach involved  
 175 thematic analysis, proposed by Braun and Clarke(27), whereas the deductive included the ICPS.  
 176 The thematic analysis was used to determine the incidents with patient details from the total  
 177 sample (n=95). The ICPS was used to identify the contributing factors and outcomes of the  
 178 incidents. Each identified issue was then characterized by either human or technical factors.

179  
 180 Two coders were involved in data analyses (both deductive and inductive) for verification and  
 181 reliability of the coding. The primary coder performed the thematic analysis, which the  
 182 secondary coder verified, and the incident was re-examined in case of any disagreement  
 183 between the coders. An agreement was reached between the coders through dialogue. The  
 184 coding of the ICPS (contributing factors and outcomes) was performed by both coders  
 185 independently. Interrater reliability using kappa score calculation was performed. A consensus  
 186 was reached in case of any difference of opinion.



## 187 Results

188 Of 95 included incident reports, 77 were from the existing databases of the local hospitals, and  
 189 18 were collected through interviews. Of the 18 incident reports collected via interview, 13  
 190 were written responses, and five were telephone interviews. All 95 incidents were aggregated  
 191 for data analysis. The incidents were reported between January 2016 and May 2021.

192  
 193 Of the total sample (n=95), 90 incidents were associated with problems with patient details  
 194 using thematic analysis, and 120 issues were identified from these problems (see Table 2). Of  
 195 90 incidents, 24 incidents comprised two issues, and three incidents resulted in three problems;  
 196 however, no particular pattern or common theme was found for the incidents with multiple  
 197 issues. The 90 incidents fell into three main categories: medical records, e-prescribing, and  
 198 medical imaging. A fourth category, "other," included clinical chemistry and psychological  
 199 treatment, which did not fall into the main three categories. When the 90 HIT incidents were  
 200 allocated to thematic analysis, 120 issues with patient details were identified, more associated  
 201 with documentation (n=62, 52%) than information (n=58, 48%) (see Table 2).

202  
 203 *Table 2 Types of patient detail issues and their association with human and technical factors*

| <b>Types of patient detail issues</b>      | <b>HF</b> | <b>TF</b> | <b>n</b>  | <b>%</b>     |
|--------------------------------------------|-----------|-----------|-----------|--------------|
| <b>Medical record-related</b>              |           |           |           |              |
| <b>Information</b>                         |           |           |           |              |
| Incorrect information                      | 18        | 0         | 18        | 15.00        |
| No/missing/lost information                | 12        | 2         | 14        | 11.67        |
| Invalid/ irrelevant/ unknown information   | 6         | 1         | 7         | 5.83         |
| Incomplete information                     | 2         | 0         | 2         | 1.67         |
| <b>Subtotal (information)</b>              | <b>38</b> | <b>3</b>  | <b>41</b> | <b>34.17</b> |
| <b>Documentation</b>                       |           |           |           |              |
| No/missing/lost documentation              | 0         | 14        | 14        | 11.67        |
| Incorrect documentation                    | 9         | 1         | 10        | 8.33         |
| Invalid documentation                      | 6         | 2         | 8         | 6.67         |
| Incomplete documentation                   | 3         | 0         | 3         | 2.50         |
| <b>Subtotal (documentation)</b>            | <b>18</b> | <b>17</b> | <b>35</b> | <b>29.17</b> |
| <b>Total (information + documentation)</b> | <b>56</b> | <b>20</b> | <b>76</b> | <b>63.33</b> |

| <b>e-Prescribing-related</b>                     |           |           |            |              |
|--------------------------------------------------|-----------|-----------|------------|--------------|
| <b>Information</b>                               |           |           |            |              |
| Incorrect information                            | 9         | 0         | 9          | 7.50         |
| No/missing/lost information                      | 3         | 0         | 3          | 2.50         |
| <b>Subtotal (information)</b>                    | <b>10</b> | <b>0</b>  | <b>12</b>  | <b>10.00</b> |
| <b>Documentation</b>                             |           |           |            |              |
| No/missing/lost documentation                    | 1         | 4         | 5          | 4.17         |
| Invalid documentation                            | 0         | 4         | 4          | 3.33         |
| Incorrect documentation                          | 2         | 0         | 2          | 1.67         |
| Incomplete documentation                         | 0         | 1         | 1          | 0.83         |
| <b>Subtotal (documentation)</b>                  | <b>3</b>  | <b>9</b>  | <b>12</b>  | <b>10.00</b> |
| <b>Total (information + documentation)</b>       | <b>13</b> | <b>9</b>  | <b>24</b>  | <b>20.00</b> |
| <b>Medical imaging-related</b>                   |           |           |            |              |
| <b>Information</b>                               |           |           |            |              |
| No/missing/lost information                      | 1         | 0         | 1          | 0.83         |
| Incorrect information                            | 0         | 1         | 1          | 0.83         |
| Invalid information                              | 1         | 0         | 1          | 0.83         |
| <b>Subtotal (information)</b>                    | <b>2</b>  | <b>1</b>  | <b>3</b>   | <b>2.50</b>  |
| <b>Documentation</b>                             |           |           |            |              |
| Incorrect documentation                          | 4         | 1         | 5          | 4.17         |
| No/missing/lost documentation                    | 0         | 4         | 4          | 3.33         |
| <b>Subtotal (documentation)</b>                  | <b>4</b>  | <b>5</b>  | <b>9</b>   | <b>7.50</b>  |
| <b>Total (information + documentation)</b>       | <b>6</b>  | <b>6</b>  | <b>12</b>  | <b>10.00</b> |
| <b>Other</b>                                     |           |           |            |              |
| <b>Information</b>                               |           |           |            |              |
| No/missing/lost information                      | 0         | 2         | 2          | 1.67         |
| <b>Subtotal (information)</b>                    | <b>0</b>  | <b>2</b>  | <b>2</b>   | <b>1.67</b>  |
| <b>Documentation</b>                             |           |           |            |              |
| No/missing/lost documentation                    | 0         | 2         | 2          | 1.67         |
| Delayed documentation                            | 0         | 2         | 2          | 1.67         |
| Incorrect documentation                          | 0         | 1         | 1          | 0.83         |
| Invalid documentation                            | 0         | 1         | 1          | 0.83         |
| <b>Subtotal (documentation)</b>                  | <b>0</b>  | <b>6</b>  | <b>6</b>   | <b>5.00</b>  |
| <b>Total (information + documentation)</b>       | <b>0</b>  | <b>8</b>  | <b>8</b>   | <b>6.67</b>  |
| <b>Grand Total (information + documentation)</b> | <b>77</b> | <b>43</b> | <b>120</b> |              |

204 HF = Human factor; TF = Technical factor

205  
 206 The problems were also classified to check for association with either human or technical  
 207 factors. Of 120 issues identified, 77 were determined to be affected by human factors (64%),  
 208 and the remaining 43 by technical factors (36%). Most problems were contributed to by human  
 209 factors (n=77; 64%), and the rest by technical factors (n=44; 36%). Within these four groups,

210 each issue was further categorized as either an information-related or documentation-related  
211 issue (see Table 2).

212

213 Interrater reliability for the outcomes was  $\kappa$  (weighted) = 0.89 ( $p < 0.001$ , 95% CI 0.81–0.98),  
214 and for the contributing factors was  $\kappa$  (weighted) = 0.87 ( $p < 0.001$ , 95% CI 0.78–0.96).

215

216 NB: It was assumed that all incidents would be associated with patient details; however, five  
217 incident descriptions did not contain patient-related information or documentation. For  
218 example, the narration of an incident described a service for automatic drug dispensing for  
219 which the service unit failed to cut the seam between medicine bags.

## 220 **Information-related issues**

221 Of the 120 issues, 48% ( $n=58$ ) comprised information-related problems (see Table 3). An  
222 example of an information-related issue may include healthcare professionals omitting patient  
223 information or writing inaccuracies in the medical record, such as blood pressure medication.

224

225 Of the 58 patient information-related problems, more than two-thirds involved medical records  
226 ( $n=41$ ; 71%) (see Table 3). Of these 41 issues, 38 were associated with human factors and three  
227 with technical factors (see Table 2). For instance, the physician prescribing an incorrect  
228 medication was considered to be associated with the human factor, whereas doctors and  
229 pharmacists did not have the same view of the medication list attributed to technical factor-  
230 related issues. The most common problem with medical records was "incorrect information"  
231 ( $n=18$ ), and all such problems were attributed to human factors.

232

233 *Table 3 Types of information-related issues and their association with human and technical factors*

| <b>Types of information-related issues</b> | <b>HF/TF</b> | <b>n</b> | <b>%</b> |
|--------------------------------------------|--------------|----------|----------|
|--------------------------------------------|--------------|----------|----------|

| <b>Medical record-related information</b>                |           |           |              |
|----------------------------------------------------------|-----------|-----------|--------------|
| <b>Incorrect information</b>                             |           |           |              |
| Incorrect patient status of care                         | HF        | 5         | 8.62         |
| Incorrect information <b>on</b> diagnosis/treatment/care | HF        | 5         | 8.62         |
| Incorrect personal/demographic data                      | HF        | 4         | 6.90         |
| Incorrect information about appointment/booking          | HF        | 3         | 5.17         |
| Incorrect examination/test data                          | HF        | 1         | 1.72         |
| <b>No/missing/lost information</b>                       |           |           |              |
| No/Missing personal/demographic data                     | HF        | 5         | 8.62         |
| No/missing information about appointment/booking         | HF        | 3         | 5.17         |
| Missing information about student's health status        | HF        | 2         | 3.45         |
| No/Missing examination/test data                         | HF        | 2         | 3.45         |
| <i>No retrieval of personal/ demographic data</i>        | <i>TF</i> | 2         | 3.45         |
| <b>Invalid/ irrelevant/ outdated information</b>         |           |           |              |
| Invalid information of diagnosis/treatment/care          | HF        | 4         | 6.90         |
| Irrelevant personal information                          | HF        | 1         | 1.72         |
| <i>Outdated personal data</i>                            | <i>TF</i> | 1         | 1.72         |
| Unknown examination data                                 | HF        | 1         | 1.72         |
| <b>Incomplete information</b>                            |           |           |              |
| Incomplete clinical history                              | HF        | 2         | 3.45         |
| <b>Total</b>                                             |           | <b>41</b> | <b>70.69</b> |
| <b>e-Prescribing-related information</b>                 |           |           |              |
| <b>Incorrect information</b>                             |           |           |              |
| Incorrect dispensing time of medication                  | HF        | 4         | 6.90         |
| Incorrect dose of medication                             | HF        | 4         | 6.90         |
| Incorrect drugs prescribed                               | HF        | 1         | 1.72         |
| <b>No/missing/lost information</b>                       |           |           |              |
| Missing information about hypersensitivity (drugs/foods) | HF        | 3         | 5.17         |
| <b>Total</b>                                             |           | <b>12</b> | <b>20.69</b> |
| <b>Medical imaging-related information</b>               |           |           |              |
| <b>No/missing/lost information</b>                       |           |           |              |
| Missing concluding information (summary)                 | HF        | 1         | 1.72         |
| <b>Incorrect information</b>                             |           |           |              |
| <i>Incorrect display of information in medical image</i> | <i>TF</i> | 1         | 1.72         |
| <b>Invalid/ irrelevant/ outdated information</b>         |           |           |              |
| Invalid (multiple) tumor iso-centre                      | HF        | 1         | 1.72         |
| <b>Total</b>                                             |           | <b>3</b>  | <b>5.17</b>  |
| <b>Other information</b>                                 |           |           |              |
| <b>No/missing/lost information</b>                       |           |           |              |
| <i>No/missing administrative information</i>             | <i>TF</i> | 2         | 3.45         |
| <b>Total</b>                                             |           | <b>2</b>  | <b>3.45</b>  |
| <b>Grand total</b>                                       |           | <b>58</b> |              |

HF = Human factor (non-italics); TF = Technical factor (Italics)

234  
235

236 A single patient information-related problem may include more than one type of information.  
 237 For example, incorrect medical record information may encompass several types of  
 238 demographic or personal information, including name, social security number, or sex. A list of  
 239 the different types of information is presented in Table 4.

240  
 241 *Table 4 Type of information involved in the information-related issues*

| <b>Type of information</b>                              | <b>n</b>  | <b>%</b>     |
|---------------------------------------------------------|-----------|--------------|
| <b>Clinical information</b>                             |           |              |
| Diagnostic information                                  | 6         | 6.74         |
| Patient status                                          | 4         | 4.49         |
| Care measures                                           | 3         | 3.37         |
| Care plan                                               | 2         | 2.25         |
| Vaccination registration                                | 2         | 2.25         |
| Alcohol history                                         | 1         | 1.12         |
| Investigation                                           | 1         | 1.12         |
| Intervention (type)                                     | 1         | 1.12         |
| <b>Total</b>                                            | <b>20</b> | <b>22.47</b> |
| <b>Demographic/personal information</b>                 |           |              |
| Patient name                                            | 7         | 7.87         |
| Patient identity                                        | 3         | 3.37         |
| Social security number                                  | 3         | 3.37         |
| Sex                                                     | 3         | 3.37         |
| Student guardians information                           | 2         | 2.25         |
| Student class affiliation                               | 1         | 1.12         |
| <b>Total</b>                                            | <b>19</b> | <b>21.35</b> |
| <b>Medication-related information</b>                   |           |              |
| Drug dose                                               | 5         | 5.62         |
| Medicine                                                | 4         | 4.49         |
| Drug dispensing information                             | 3         | 3.37         |
| <b>Total</b>                                            | <b>12</b> | <b>13.48</b> |
| <b>Requests/referral related</b>                        |           |              |
| Appointments                                            | 4         | 4.49         |
| Electronic order                                        | 3         | 3.37         |
| <i>Referral</i>                                         | 3         | 3.37         |
| Examination request                                     | 1         | 1.12         |
| <b>Total</b>                                            | <b>12</b> | <b>13.48</b> |
| <b>Pathophysiological (disease)-related information</b> |           |              |
| <i>Hypersensitivity</i>                                 | 4         | 4.49         |
| Aortic rupture                                          | 1         | 1.12         |
| Emergency medical care                                  | 1         | 1.12         |
| Cardiac arrest event                                    | 1         | 1.12         |

|                                 |           |              |
|---------------------------------|-----------|--------------|
| Bleeding                        | 1         | 1.12         |
| Suicide                         | 1         | 1.12         |
| <b>Total</b>                    | <b>9</b>  | <b>10.11</b> |
| <b>Personal measures</b>        |           |              |
| Weight                          | 2         | 2.25         |
| Back                            | 1         | 1.12         |
| Hearing                         | 1         | 1.12         |
| Height                          | 1         | 1.12         |
| Vision                          | 1         | 1.12         |
| <b>Total</b>                    | <b>6</b>  | <b>6.74</b>  |
| <b>Examination/Test related</b> |           |              |
| Examination items               | 1         | 1.12         |
| Sampling time                   | 1         | 1.12         |
| Sampling responses              | 1         | 1.12         |
| Test date                       | 1         | 1.12         |
| Type of examination             | 1         | 1.12         |
| <b>Total</b>                    | <b>5</b>  | <b>5.62</b>  |
| <b>Administration related</b>   |           |              |
| Patient bed                     | 1         | 1.12         |
| Staff categories                | 1         | 1.12         |
| Term of benefit                 | 1         | 1.12         |
| <b>Total</b>                    | <b>3</b>  | <b>3.37</b>  |
| <b>Medical imaging</b>          |           |              |
| Tumor isocentre central         | 1         | 1.12         |
| Tooth graphic                   | 1         | 1.12         |
| <b>Total</b>                    | <b>2</b>  | <b>2.25</b>  |
| <b>Communication-related</b>    |           |              |
| Health follow-up                | 1         | 1.12         |
| <b>Total</b>                    | <b>1</b>  | <b>1.12</b>  |
| <b>Grand Total</b>              | <b>89</b> |              |

242  
 243 Patient details-related issues associated with patient information fell into four categories:  
 244 incorrect information, no/missing/lost information, invalid/irrelevant/outdated information, or  
 245 incomplete information. There were consistent indications of the things going wrong in which  
 246 human failures played a major role. Among information-related issues, human factors  
 247 manifested "incorrect information" (27 of 28) and "no/missing/lost information" (16 of 20) (see  
 248 Table 5).

249  
 250 *Table 5 Finite categories of information-related issues and their association with human and technical factors*

| Finite categories of information-related issues | HF | TF | n | % |
|-------------------------------------------------|----|----|---|---|
|-------------------------------------------------|----|----|---|---|

|                                           |           |          |           |       |
|-------------------------------------------|-----------|----------|-----------|-------|
| Incorrect information                     | 27        | 1        | 28        | 48.28 |
| No/missing/lost information               | 16        | 4        | 20        | 34.48 |
| Invalid/ irrelevant/ outdated information | 7         | 1        | 8         | 13.79 |
| Incomplete information                    | 2         | 0        | 2         | 3.45  |
| <b>Total</b>                              | <b>52</b> | <b>6</b> | <b>58</b> |       |

251 HF = Human factor; TF = Technical factor

## 252 Documentation-related issues

253 Of the 120 problems, 52% (n=62) were document-related issues (see Table 6). An illustration  
 254 of documentation-related issues may involve multiple imaging requests that were required to  
 255 be written in paper form because of a malfunction of the radiology ordering system.

256  
 257 *Table 6 Types of documentation-related issues and their association with human and technical factors*

| <b>Types of documentation-related issues</b>     | <b>HF/TF</b> | <b>n</b>  | <b>%</b>     |
|--------------------------------------------------|--------------|-----------|--------------|
| <b>Medical records-related documentation</b>     |              |           |              |
| <b>No/missing/lost documentation</b>             |              |           |              |
| <i>Missing patient record</i>                    | <i>TF</i>    | 5         | 8.06         |
| <i>No/Missing sick/medical certificate</i>       | <i>TF</i>    | 3         | 4.84         |
| <i>No/missing request/order/appointment form</i> | <i>TF</i>    | 3         | 4.84         |
| <i>Missing patient report</i>                    | <i>TF</i>    | 2         | 3.23         |
| <i>Missing waiting list entry</i>                | <i>TF</i>    | 1         | 1.61         |
| <b>Incorrect documentation</b>                   |              |           |              |
| Incorrect patient record                         | HF           | 6         | 9.68         |
| Incorrect request/order/appointment form         | HF           | 3         | 4.84         |
| <i>Another patient's request form</i>            | <i>TF</i>    | 1         | 1.61         |
| <b>Invalid/ outdated documentation</b>           |              |           |              |
| Unauthorized access/process to medical record    | HF           | 5         | 8.06         |
| <i>Outdated documentation</i>                    | <i>TF</i>    | 2         | 3.23         |
| Confused medical record                          | HF           | 1         | 1.61         |
| <b>Incomplete documentation</b>                  |              |           |              |
| Incomplete document for care plan                | HF           | 3         | 4.84         |
| <b>Total</b>                                     |              | <b>35</b> | <b>56.45</b> |
| <b>e-Prescribing-related documentation</b>       |              |           |              |
| <b>No/missing/lost documentation</b>             |              |           |              |
| <i>Missing prescription</i>                      | <i>TF</i>    | 3         | 4.84         |
| <i>No display of "terms of benefit"</i>          | <i>TF</i>    | 1         | 1.61         |
| No medical prescription sent                     | HF           | 1         | 1.61         |
| <b>Invalid/ outdated documentation</b>           |              |           |              |
| <i>Outdated prescription</i>                     | <i>TF</i>    | 2         | 3.23         |
| <i>Different drug list</i>                       | <i>TF</i>    | 2         | 3.23         |
| <b>Incorrect documentation</b>                   |              |           |              |
| Another patient's prescription                   | HF           | 2         | 3.23         |
| <b>Incomplete documentation</b>                  |              |           |              |
| <i>Incomplete display of prescription</i>        | <i>TF</i>    | 1         | 1.61         |

|                                               |           |           |              |
|-----------------------------------------------|-----------|-----------|--------------|
| <b>Total</b>                                  |           | <b>12</b> | <b>19.35</b> |
| <b>Medical Imaging-related documentation</b>  |           |           |              |
| <b>Incorrect documentation</b>                |           |           |              |
| Incorrect medical image obtained/transferred  | HF        | 4         | 6.45         |
| <i>Incorrect generation of X-ray referral</i> | <i>TF</i> | 1         | 1.61         |
| <b>No/missing/lost documentation</b>          |           |           |              |
| <i>No retrieval of medical image</i>          | <i>TF</i> | 3         | 4.84         |
| <i>No transfer of image</i>                   | <i>TF</i> | 1         | 1.61         |
| <b>Total</b>                                  |           | <b>9</b>  | <b>14.52</b> |
| <b>Other documentation</b>                    |           |           |              |
| <b>No/missing/lost documentation</b>          |           |           |              |
| <i>No message/chat</i>                        | <i>TF</i> | 2         | 3.23         |
| <b>Delayed documentation</b>                  |           |           |              |
| <i>Delayed delivery of the message</i>        | <i>TF</i> | 2         | 3.23         |
| <b>Incorrect documentation</b>                |           |           |              |
| <i>Incorrect message delivered</i>            | <i>TF</i> | 1         | 1.61         |
| <b>Invalid documentation</b>                  |           |           |              |
| <i>Different alarm logs</i>                   | <i>TF</i> | 1         | 1.61         |
| <b>Total</b>                                  |           | <b>6</b>  | <b>9.68</b>  |
| <b>Grand Total</b>                            |           | <b>62</b> |              |

258 HF = Human factor (non-italics); TF = Technical factor (Italics)

259  
 260 Of the 62 documentation-related problems, more than half were associated with medical records  
 261 (n=35; 56%) (see Table 4). Of these 35 issues, 18 were attributed to human factors and 17 to  
 262 technical factors (see Table 6). The most common issue with medical records was  
 263 "no/lost/missing documentation" (n=14), of which all were associated with technical factors. A  
 264 list of document types is presented in Table 7, of which fewer than half comprised clinical  
 265 documents (n=24; 44%).

266  
 267 *Table 7 Type of documentation involved in the documentation-related issues*

| <b>Type of document involved</b> | <b>n</b>  | <b>%</b>     |
|----------------------------------|-----------|--------------|
| <b>Clinical document</b>         |           |              |
| Medical record                   | 11        | 20.00        |
| Patient report                   | 5         | 9.09         |
| Certificates (sick)              | 4         | 7.27         |
| Patient meeting documentation    | 1         | 1.82         |
| Waiting list                     | 1         | 1.82         |
| Checklist                        | 1         | 1.82         |
| Treatment template               | 1         | 1.82         |
| <b>Total</b>                     | <b>24</b> | <b>43.64</b> |



| <b>Medication-related document</b>      |           |              |
|-----------------------------------------|-----------|--------------|
| Prescription                            | 8         | 14.55        |
| Drug lists                              | 2         | 3.64         |
| <b>Total</b>                            | <b>10</b> | <b>18.18</b> |
| <b>Medical imaging-related document</b> |           |              |
| Medical image                           | 8         | 14.55        |
| Imaging report                          | 2         | 3.64         |
| <b>Total</b>                            | <b>10</b> | <b>18.18</b> |
| <b>Request/booking form</b>             |           |              |
| Request form                            | 3         | 5.45         |
| Booking form                            | 2         | 3.64         |
| <b>Total</b>                            | <b>5</b>  | <b>9.09</b>  |
| <b>Communication-related document</b>   |           |              |
| Message (chat)                          | 5         | 9.09         |
| <b>Total</b>                            | <b>5</b>  | <b>9.09</b>  |
| <b>Other documents</b>                  |           |              |
| Alarm logs                              | 1         | 1.82         |
| <b>Total</b>                            | <b>1</b>  | <b>1.82</b>  |
| <b>Grand Total</b>                      | <b>55</b> |              |

268  
 269 Documentation-related patient-detail problems fell into five categories: no/missing/lost  
 270 documentation, incorrect documentation, invalid/outdated documentation, incomplete  
 271 information, or delayed documentation. Among these, human factors predominated in the  
 272 causation of "incorrect documentation" (15 of 18), while technical factors predominated in  
 273 "no/missing/lost documentation" (24 of 25) (see Table 8).

274  
 275 *Table 8 Finite categories of documentation-related issues and their association with human and technical factors*

| <b>Finite categories of documentation-related issues</b> | <b>HF</b> | <b>TF</b> | <b>n</b>  | <b>%</b>     |
|----------------------------------------------------------|-----------|-----------|-----------|--------------|
| No/missing/lost documentation                            | 1         | 24        | 25        | 40.32        |
| Incorrect documentation                                  | 15        | 3         | 18        | 29.03        |
| Invalid/ outdated documentation                          | <b>6</b>  | <b>7</b>  | <b>13</b> | 20.97        |
| Incomplete documentation                                 | <b>3</b>  | <b>1</b>  | <b>4</b>  | 6.45         |
| Delayed documentation                                    | <b>0</b>  | <b>2</b>  | <b>2</b>  | 3.23         |
| <b>Total</b>                                             | <b>25</b> | <b>37</b> | <b>62</b> | <b>51.67</b> |

276 HF = Human factor; TF = Technical factor

## 277 **Contributing factors**

278 The ICPS was used to capture detailed information about the types of contributing factors  
 279 associated with those 90 incidents involving patient details-related issues. Of these 90 incidents,

280 87 contributing factors were identified, of which fewer than half (45%) comprised "medical  
 281 device/system" factors (n=39) (see Table 9).

282 *Table 9 Types of contributing factors involved in the patient details-related issues*  
 283

| <b>Contributing factors</b>                 | <b>n</b>  | <b>%</b>     |
|---------------------------------------------|-----------|--------------|
| <b>Medical device/ system factor</b>        |           |              |
| Device or system usability                  | 16        | 18.39        |
| Device or system not working/slow/ failed   | 11        | 12.64        |
| Device or system suitability for purpose    | 9         | 10.34        |
| Device or system unavailable/inaccessible   | 2         | 2.30         |
| Device or system unfamiliar                 | 1         | 1.15         |
| <b>Subtotal</b>                             | <b>39</b> | <b>44.83</b> |
| <b>Documentation factor</b>                 |           |              |
| Missing/unavailable documentation           | 7         | 8.05         |
| Unclear/ambiguous/ duplicated documentation | 4         | 4.60         |
| Breach of privacy                           | 4         | 4.60         |
| Inadequate/ incomplete documentation        | 2         | 2.30         |
| <b>Subtotal</b>                             | <b>17</b> | <b>19.54</b> |
| <b>Staff factor</b>                         |           |              |
| Unknown/ Not clear                          | 10        | 11.49        |
| Inattention/distraction/negligence          | 3         | 3.45         |
| Knowledge/skills/awareness                  | 3         | 3.45         |
| Fail to carry out duty                      | 1         | 1.15         |
| <b>Subtotal</b>                             | <b>17</b> | <b>19.54</b> |
| <b>Communication factor</b>                 |           |              |
| Not conducted                               | 6         | 6.90         |
| Inaccurate information communicated         | 3         | 3.45         |
| Incomplete                                  | 1         | 1.15         |
| <b>Subtotal</b>                             | <b>10</b> | <b>11.49</b> |
| <b>Policy/guideline-related factor</b>      |           |              |
| Policy/guideline not followed               | 2         | 2.30         |
| <b>Subtotal</b>                             | <b>2</b>  | <b>2.30</b>  |
| <b>Patient factor</b>                       |           |              |
| Inattention/distraction/negligence          | 1         | 1.15         |
| Knowledge/skills/awareness                  | 1         | 1.15         |
| <b>Subtotal</b>                             | <b>2</b>  | <b>2.30</b>  |
| <b>Total</b>                                | <b>87</b> |              |

284  
 285 Among medical device/system-related factors, "device/system usability" (n=16) was most  
 286 common; for instance, the computer system malfunctioned at the beginning of imaging because  
 287 the imaging modality was turned on in haste. Both documentation (n=17) and staff (n=17) each

288 contributed to one-fifth (20%) of the total factors (see Table 9). Documentation factors were  
289 mainly associated with "missing/unavailable documentation" (n=7); for example, a patient  
290 summary could not be retrieved because the patient record was missing.

291  
292 However, staff-related factors were largely unclear or not known due to insufficient narration  
293 of the incident descriptions (see Table 9). In these cases, it was quite clear that healthcare staff  
294 contributed to an incident, but information about the type of contributing factor was lacking.  
295 For example, a report indicated that staff omitted information or wrote inaccuracies in the  
296 medical record, but no indication was given of their reason for doing so.

297  
298 Regarding "medical device/system," the most common factor was "device or system usability"  
299 (n=16; 18%), indicating that users or healthcare staff had difficulty using the system, which  
300 contributed to the incident. For example, a user could not enter complete patient prescription  
301 details because benefit terms were not displayed in the intended context. 11% of incidents  
302 comprised the communication factor, of which communication was "not conducted" in six cases  
303 (see Table 9).

304  
305 Moreover, "medical device/system" and "documentation" were the most common contributing  
306 factors, especially when the incidents themselves were HIT system issues (in nature) and  
307 involved documentation-related problems (through thematic analysis). This phenomenon  
308 confirms the recursive nature of errors and the frequent correlation between types of problems  
309 and specific contributing factors. Therefore, the phenomenon may be considered an issue, a  
310 contributing factor, or both based on the incident's features or characteristics in that specific  
311 context.

## 312 Outcomes

313 The outcomes of all 90 incidents were identified using the ICPS, and each incident was assigned  
 314 one outcome. The outcomes were broadly classified into two categories, namely, patient-  
 315 related, comprising patient inconvenience and patient harm, or staff/organization-related. Of 90  
 316 incidents, more than half (59%) comprised patient-related outcomes (n=53)—patient  
 317 inconvenience (n=42; 47%) and patient harm (n=11; 12%). The remaining 41% (n=37)  
 318 comprised staff or organization-related outcomes (see Table 10).

319  
 320 *Table 10 Types of outcomes resulting from the patient details-related issues*

| Outcomes                                             | N         | %            |
|------------------------------------------------------|-----------|--------------|
| <b>Patient-related outcomes</b>                      |           |              |
| <b>Patient inconvenience</b>                         |           |              |
| Delays in management diagnosis/procedure/treatment   | 17        | 18.89        |
| Unnecessary treatment                                | 9         | 10.00        |
| Patient dissatisfaction                              | 8         | 8.89         |
| Repeated or additional diagnosis/procedure/treatment | 5         | 5.56         |
| Financial implications                               | 3         | 3.33         |
| <b>Subtotal</b>                                      | <b>42</b> | <b>46.67</b> |
| <b>Patient harm</b>                                  |           |              |
| Pathophysiological disease related                   | 6         | 6.67         |
| Injury                                               | 4         | 4.44         |
| Death                                                | 1         | 1.11         |
| <b>Subtotal</b>                                      | <b>11</b> | <b>12.22</b> |
| <b>Total</b>                                         | <b>53</b> | <b>58.89</b> |
| <b>Staff or organization-related outcomes</b>        |           |              |
| More system/service/resource used                    | 14        | 15.56        |
| Delays in using facilities/service/system            | 10        | 11.11        |
| Increased documentation                              | 7         | 7.78         |
| Phone calls/review/follow-up                         | 6         | 6.67         |
| <b>Subtotal</b>                                      | <b>37</b> | <b>41.11</b> |
| <b>Total</b>                                         | <b>37</b> | <b>41.11</b> |
| <b>Grand total</b>                                   | <b>90</b> |              |

321  
 322 Within patient inconvenience, delays in care management (diagnosis/procedure/treatment)  
 323 accounted for 19% (n=17) of outcomes. Such delays included investigation of the patient  
 324 treatment plan, care measures, acquisition of images, or medication management. Unnecessary

325 treatment (n=9; 10%) included patient treatment that was not required; for example, patient  
326 treatment with blood pressure medication despite any such symptoms or imaging with  
327 unnecessary radiation dose. Patient dissatisfaction (n=8; 9%) was expressed either in informal  
328 complaints or expressions of dissatisfaction, including decreased confidence in care delivery,  
329 suspicions of unauthorized medical records access, or concerns about the competence of the  
330 care providers. Repeated or additional diagnosis/procedure/treatment (n=5; 6%) was performed  
331 when the healthcare professionals found that the wrong patient was treated/imaged or that the  
332 right patient underwent the wrong treatment or examination. These problems caused the same  
333 patient to undergo the same imaging, examination, or treatment twice. Three cases of financial  
334 implications for patients were identified, including denial of payment or failure to pay  
335 compensation or sickness benefit (see Table 10).

336  
337 Six cases resulted in pathophysiological disease-related harm to the patient, including risks of  
338 disease or severe deterioration of health due to wrong medication. These comprised four cases  
339 of serious injury and one patient death. However, no further information regarding the injury  
340 was reported, and the death was not reported to be directly caused by the incident (see Table  
341 10).

342  
343 Of the staff or organization-related outcomes, 16% (n=14) resulted in more  
344 equipment/services/resources being used in the form of similar systems or USB sticks, manual  
345 extraction/entry of data, or other healthcare professionals, including medical engineers or IT  
346 experts. 11% of outcomes resulted in delays in using facilities/service/systems, for example,  
347 storage server access delays due to system shutdown; 8% led to increased documentation, such  
348 as rewriting imaging orders in paper form; and the remaining 7% resulted in phone

349 calls/review/follow-up, such as contacting other staff involved in the same treatment (see Table  
350 10).

## 351 **Discussion**

352 In the last three decades, healthcare quality and safety have been on the agenda because the  
353 healthcare system can harm patients; for example, a single large-scale event may even affect  
354 multiple patients' care management (26). Even though HIT has improved efficiency, its design,  
355 use, and implementation can negatively impact patient care and safety (12, 28). The Joint  
356 Commission that accredits healthcare organizations in the US suggested that diligent adherence  
357 to protocol, cross-checking HIT systems' information and documents, and the use of interpreters  
358 for foreign patients could potentially detect and mitigate such problems (29).

359  
360 A report in Australia suggests that patient information and documentation issues were  
361 significant modifiable risks in medical imaging, nuclear medicine, radiation therapy, and oral  
362 surgery. These risks persisted even after developing and implementing the Correct Patient,  
363 Correct Site, and Correct Procedure (3Cs) Protocol in 2004 (30). However, caution is advised  
364 since the daily average volume of medical exams read by radiologists has increased sevenfold  
365 in the last seven years. As thousands of patients are processed, transported, treated, and  
366 examined by hundreds of healthcare staff in the day-to-day clinical routine, the risks for such  
367 failures are enormous (30). The report further indicated that the factors contributing to such  
368 incidents include "heavy workload" and "policies/guidelines not followed", suggesting that  
369 healthcare professionals do not receive enough time to follow the protocol (30).

## 370 **Human versus technical factors**

371 Healthcare is a complex sociotechnical system in which various human factors, including  
372 behavior, performance, and culture, play a vital role in building an intimate relationship with  
373 the HIT systems. These factors can improve healthcare quality and safety or cause harm and  
374 disrupt healthcare processes (31). Even though many technical issues and failures were  
375 identified in the reports, we did not expect that more than half of the issues would be caused by  
376 human factors (n=77; 64%). However, the incident reports did not contain adequate information  
377 to explore further any connection with human behavior, performance, and culture.

378  
379 Despite the analysis providing no indication of the absolute frequencies of these issues, it does  
380 assure the fact that human errors play a vital role in HIT incidents (32). The advantage of  
381 systems is that they can be incrementally improved, while the errors of human users are  
382 inevitable and remain an inherent part of the complex sociotechnical healthcare system. "Whilst  
383 system issues can be progressively "designed out", it would seem that in the meantime, the  
384 rapid availability of experts to diagnose and apply a digital solution to such problems would be  
385 highly desirable" (17). Therefore, more considerable thought should be placed on the HIT  
386 systems to be designed to prevent specific issues from occurring. This can also be backed up by  
387 observational and ethnographic studies that would prevent the occurrence of issues such as those  
388 listed throughout this study (28, 32).

## 389 **Humans as the weak link, and the need for training for healthcare** 390 **professionals**

391 A review of 436 HIT incident reports by Jabin et al. reported that human factors are inevitable  
392 in the genesis of over 58% of the issues in most complex sociotechnical systems (12). Magrabi

393 et al., in a review of 850 incidents, summarized that human factors were responsible for patient  
394 harm four times more often than technical factors (18).

395  
396 Human error is difficult (if not impossible) to prevent because neither seniority nor experience  
397 offers immunity (33). An error occurs through various unintended and unknown cognitive  
398 mechanisms beyond human control (34). Even though using the "forcing function" was  
399 suggested to prevent such human errors by Norman (34), it would cause "over-  
400 proceduralization" that may detract from surveillance and situational awareness. Therefore, it  
401 would rather be suitable to design the system in such a way as to prevent incidents from  
402 occurring, as well as provide training to system users (17).

403  
404 Healthcare professionals are seldom provided with sufficient training or education for the  
405 proper use and operation of HIT systems, manifesting as a lack of proficiency in handling them  
406 in healthcare settings (35). For example, a review of 436 HIT incidents by Jabin et al. suggests  
407 that system integration and software update-related issues do contribute to human error, causing  
408 incorrect entry of patient information and workflow disruptions (17).

409  
410 Since human error remains an enduring part of the complex healthcare system, it is critically  
411 essential to establish an ongoing training process for healthcare professionals in connection  
412 with vendors (17). The Joint Commission suggested that healthcare professionals, as the major  
413 contributor to HIT-related problems, should be adequately trained (29). Therefore, training  
414 healthcare professionals before integrating HIT systems and software updates, and preparing  
415 them for unexpected system failures, will result in better use of the HIT systems and greater  
416 user satisfaction, thus mitigating the risks of human problems.

417



418 However, professional development to acquire HIT-related skills and competencies can affect  
419 patient safety as it hinders clinicians from regular routine practice, such as patient care activities  
420 (36). One of the effective approaches to overcome this barrier is to combine conventional  
421 classroom training with simulation-based training (37). This approach is useful for novice user  
422 but not for experienced participants who may intend to refrain from any additional training (37).  
423 Another approach is to set aside adequate paid time for balancing the training and their day-to-  
424 day clinical practice (17). These approaches can also be supplemented by basic health literacy  
425 programs, which may involve patients in managing their own care (38). For example, a defense  
426 mechanism in the general healthcare system can be improved by identifying incorrect  
427 prescriptions by means of providing basic health literacy to patients (39).

428

429 Therefore, training healthcare professionals before integrating HIT systems and software  
430 updates, and preparing them for unexpected system failures, will result in better use of the HIT  
431 systems and greater user satisfaction, thus mitigating the risks of human problems.

## 432 **Lack of human-centered design of HIT systems**

433 Even if it is called the “human factor” or “human errors”, it should be clarified that often it is  
434 not individuals who are to be blamed. Rather, it is the complex systems the healthcare  
435 professionals work in that are not sufficiently designed (40). Although there was a separation  
436 of the human factors from the technical in this study, humans constantly interact with multiple  
437 other systems or elements when performing their jobs in complex systems. These include  
438 people, job tasks, technology, physical and social environments, the organization of work, and  
439 external issues such as regulation and research findings (41, 42). Often, systemic influences and  
440 reasons that are either unknown/or unknowable fall under the category of system design–human  
441 interaction issues (43, 44).

442

443 The concept of 'human error' as it applies in complex sociotechnical systems, combined with  
444 the lack of human-centered HIT design, causes the system to be unsafe and suffer from usability  
445 issues (45). The great majority of data reported, therefore, are, in fact, human factors-related  
446 issues. Therefore, blaming the end-user of these systems as contributors to these incidents  
447 without extensive evidence occurring in day-to-day clinical practice is not appropriate.

448

449 Human error can potentially be mitigated by designing systems to prevent incidents from  
450 occurring and designing out the "error-prone features". With considerable thought and  
451 ingenuity, the National Health Service (NHS) and the US National Institute of Standards and  
452 Technology (NIST) developed and published guidelines and standards for interface design for  
453 clinical user interface (45) and EMR usability (46). The HIT industries and national  
454 standardization bodies should step in for the design and development of well-established  
455 guidelines and standards for safety-critical software. These guidelines and measures should be  
456 established based on coveted and suitable working procedures, maintained by national  
457 standardization bodies, and backed by government authorities (47).

## 458 **Disruptions in the clinical workflow and the need for a holistic view of** 459 **healthcare**

460 In this study, approximately 41% of cases had a staff/organization-related outcome. There was  
461 a clear indication that workflow disruptions resulted in additional system/service/resource use  
462 and delays in using facilities/service/systems. More than one-third of problems in this study  
463 were associated with incorrect patient information or documentation (n=46; 38%). These events  
464 caused several risks to patients, such as increased radiation risks, unnecessary procedures, or  
465 delays in obtaining correct procedures or medication. Such delays in procedure further delayed

466 diagnosis, treatment initiation, treatment impact monitoring, and decisions regarding future  
467 treatment options (continuation, discontinuation, or change in treatment). Once an incorrect  
468 piece of information or document is introduced into the system, an "automation bias" tends to  
469 consider it correct (48).

470  
471 Over the decades, health informatics researchers have been studying the effect of patient  
472 information and documentation-related problems that affect the clinical workflow. A review of  
473 149 HIT incidents by Warm and Edwards in 2012 reported that around 34% of the total sample  
474 was patient information-related issues, which were categorized into information output (n=25;  
475 16%), information transfer (n=7; 5%), and information input (n=19; 13%) (49). Other studies  
476 reported that the quality of the care delivery was compromised by less-than-optimal care, or the  
477 risks to patient safety were caused by things going wrong with care delivery (17, 50). Some of  
478 the negative impacts include delayed procedures (5), confusion about the patient treatments  
479 (51), inappropriate decision-making based on incorrect or outdated information (52), and  
480 patient harm (51, 53).

481  
482 A holistic view of the healthcare workflow is necessary to understand and identify the risks.  
483 This could include an assessment of risks among various healthcare departments, such as  
484 medical imaging, emergency departments, theatres, and Intensive Care Units (ICU). This risk  
485 assessment should be accompanied by the ongoing development of new effective strategies to  
486 mitigate risk. For example, Jabin et al. reported that failures related to patient information or  
487 documentation can occur at any stage, such as clinical consultation to clinical action with  
488 particular focus on the medical imaging workflow process (12). This is true even in our study  
489 of the incidents associated with patient identification issues, irrespective of the process  
490 workflow in medical imaging or e-prescribing. However, the present study did not consider

491 clinical workflow stages or their association with patient detail issues. Therefore, it is essential  
492 to examine different types of patient information and documentation problems, their causation,  
493 and their effects on the clinical workflow. This can further help develop the workflow and  
494 design solutions addressing particular issues for each healthcare department.

## 495 **Strengths and limitations of this study**

496 Incident reports are voluntary, subject to bias, and self-reported. The low response rate was due  
497 to the ongoing COVID-19 pandemic, which resulted in a smaller sample than planned. The  
498 reporters were not experts in HIT (54), as there needed to be more accurate in the reported  
499 narrative texts, making it impossible to categorize three incidents. For example, an incident was  
500 assigned at least one contributing factor; however, it was impossible to classify three incidents  
501 to identify even one contributing factor due to insufficient incident description. Therefore, 12%  
502 of staff factor-related incidents were categorized as "unknown/unclear" (see Table 7). The  
503 inadequacy in the reports also affected the categorization of information-/documentation-  
504 related issues; for example, "no" information/documentation was merged with "missing/lost"  
505 information/documentation. In addition, most of the issues affected by the "staff factor" could  
506 not be identified for the same reason—insufficient narrative texts in the report.

507  
508 It was a limited data source, and thus it is assumed that incidents were not detected in many  
509 cases and not reported even if they were detected (55). Moreover, the total number or frequency  
510 of events (failures) can never be compared to successful actions that occur in healthcare.  
511 Therefore, the analyses cannot manifest the absolute frequency of the issues, contributing  
512 factors, or the identified outcomes. However, the numbers and frequency do provide a salient  
513 sense of HIT issues that occur in day-to-day clinical practice and demonstrate the harmful role  
514 of human error in patient details-related problems.

515

516 The incident reports were analyzed using thematic analysis and classified using the ICPS by an  
517 expert analyst who previously investigated, analyzed, and classified a large set of incident  
518 reports—around 5,000 medical imaging incident reports in Australia. The secondary coder was  
519 extensively trained to classify the incidents using the ICPS. Also, the ICPS was initially  
520 developed without considering the HIT system; therefore, a slight modification of the  
521 contributing factor nomenclature "medical device/system" has been considered for this study.  
522 Moreover, a combination of both deductive and inductive approaches made it possible to extract  
523 information that may not be evident using any one method of analysis. Moreover, the recursive  
524 model of the descriptions of errors and how they occurred constitutes a measure of internal  
525 validation for the incident reporting and classification process.

526

527 The collection of incident reports ranged over a significant period, validating the feasibility of  
528 monitoring incidents regularly. Therefore, new features of the existing problems may have  
529 emerged, and new, unforeseen, and unprecedented issues may have been identified. The issues  
530 identified in this study are compliant with amelioration and mitigation through a systemic  
531 approach and rigorous research, such as providing training to healthcare professionals, vigilant  
532 system design and implementation, and redesigning the clinical workflow. The issues can be  
533 mitigated by permitting timely application of preventive and corrective strategies at systemic  
534 and local levels.

535

536 Even though minimal studies on incident analysis have been published, Sweden currently has  
537 a comprehensive program on medical device and HIT systems managed by the MPA to ensure  
538 quality improvement in Swedish healthcare. Therefore, the results obtained, i.e., the broader  
539 categories of the issues, are similar to those previously identified in Australia (32) and the UK

540 (49). This means the lessons learned may be suitable and applicable elsewhere to maintain risk  
541 management standards.

## 542 **Conclusion**

543 This study provided insight into patient information/documentation-related problems vis-à-vis  
544 HIT and how human and technical factors affect patient care delivery. The deductive and  
545 inductive approaches analyses provided useful context to the reporters and analysts regarding  
546 where preventive and corrective strategies should be addressed. Therefore, characterizing such  
547 HIT incidents and identifying patient details-related problems should be a routine part of  
548 clinical practice to improve the constantly changing healthcare system.

## 549 **Acknowledgment**

550 The authors wish to thank Sofia Backåberg and Pauline Johansson, Senior Lecturers at Linnaeus  
551 University for their help and support.

## 552 **Reference**

- 553 1. Bates DW, Gawande AA. Improving safety with information technology. *N Engl*  
554 *J Med.* 2003;348(25):2526-34.
- 555 2. Petersen LA, Orav EJ, Teich JM, O'Neil AC, Brennan TA. Using a computerized  
556 sign-out program to improve continuity of inpatient care and prevent adverse events. *Jt Comm*  
557 *J Qual Improv.* 1998;24(2):77-87.
- 558 3. Patient Safety: Achieving a New Standard for Care. [press release]. Washington,  
559 D.C.: National Academy Press 2004.
- 560 4. Gans D, Kralewski J, Hammons T, Dowd B. Medical groups' adoption of  
561 electronic health records and information systems. *Health Aff (Millwood).* 2005;24(5):1323-  
562 33.
- 563 5. Koppel R, Metlay JP, Cohen A, Abaluck B, Localio AR, Kimmel SE, et al. Role  
564 of computerized physician order entry systems in facilitating medication errors. *JAMA.*  
565 2005;293(10):1197-203.
- 566 6. Abramson EL, Patel V, Malhotra S, Pfoh ER, Nena Osorio S, Cheriff A, et al.  
567 Physician experiences transitioning between an older versus newer electronic health record for  
568 electronic prescribing. *Int J Med Inform.* 2012;81(8):539-48.

- 569 7. Sittig DF, Singh H. Defining health information technology-related errors: new  
570 developments since to err is human. *Archives of internal medicine*. 2011;171(14):1281-4.
- 571 8. Siegler EL, Adelman R. Copy and paste: a remediable hazard of electronic health  
572 records. *Am J Med*. 2009;122(6):495-6.
- 573 9. Collins SA, Bakken S, Vawdrey DK, Coiera E, Currie L. Model development for  
574 EHR interdisciplinary information exchange of ICU common goals. *Int J Med Inform*.  
575 2011;80(8):e141-9.
- 576 10. Bjerkan J, Valderaune V, Olsen RM. Patient Safety Through Nursing  
577 Documentation: Barriers Identified by Healthcare Professionals and Students. *Frontiers in*  
578 *Computer Science*. 2021;3.
- 579 11. Clynch N, Kellett J. Medical documentation: part of the solution, or part of the  
580 problem? A narrative review of the literature on the time spent on and value of medical  
581 documentation. *Int J Med Inform*. 2015;84(4):221-8.
- 582 12. Jabin MSR, Mandel C, Schultz T, Hibbert P, Magrabi F, Runciman W, editors.  
583 Identifying and Characterizing the 18 Steps of Medical Imaging Process Workflow as a Basis  
584 for Targeting Improvements in Clinical Practice. 2019 IEEE International Conference on  
585 Imaging Systems and Techniques (IST); 2019. Abu Dhabi: IEEE Xplore; 2020.
- 586 13. Salvendy G. *Handbook of Human Factors and Ergonomics*: John Wiley and Sons,  
587 Inc.; 2012.
- 588 14. Ashbourn J. *Practical Biometrics*. London: Springer; 2015.
- 589 15. Swedish Medical Products Agency. Reporting adverse reactions, events and  
590 incidents 2017 [
- 591 16. Magrabi F, Ong MS, Runciman W, Coiera E. An analysis of computer-related  
592 patient safety incidents to inform the development of a classification. *J Am Med Inform Assoc*.  
593 2010;17(6):663-70.
- 594 17. Jabin MSR, Magrabi F, Hibbert P, Schultz T, Bessen T, Runciman W, editors.  
595 Identifying and characterizing system issues of health information technology in medical  
596 imaging as a basis for recommendations. 2019 IEEE International Conference on Imaging  
597 Systems and Techniques (IST); 2019. Abu Dhabi: IEEE Xplore; 2020.
- 598 18. Magrabi F, Baker M, Sinha I, Ong MS, Harrison S, Kidd MR, et al. Clinical safety  
599 of England's national programme for IT: a retrospective analysis of all reported safety events  
600 2005 to 2011. *Int J Med Inform*. 2015;84(3):198-206.
- 601 19. Castro GM, Buczkowski L, Hafner JM. The Contribution of Sociotechnical  
602 Factors to Health Information Technology-Related Sentinel Events. *Jt Comm J Qual Patient*  
603 *Saf*. 2016;42(2):70-6.
- 604 20. Runciman WB, Williamson JA, Deakin A, Benveniste KA, Bannon K, Hibbert  
605 PD. An integrated framework for safety, quality and risk management: an information and  
606 incident management system based on a universal patient safety classification. *Qual Saf Health*  
607 *Care*. 2006;15 Suppl 1:i82-90.
- 608 21. Runciman WB, Hibbert P, Thomson R, Van Der Schaaf T, Sherman H, Lewalle  
609 P. Towards an International Classification for Patient Safety: key concepts and terms. *Int J Qual*  
610 *Health Care*. 2009;21(1):18-26.
- 611 22. Jabin MSR, Magrabi F, Hibbert P, Schultz T, Runciman W, editors. Identifying  
612 Clusters and Themes from Incidents Related to Health Information Technology in Medical  
613 Imaging as a Basis for Improvements in Practice. 2019 IEEE International Conference on  
614 Imaging Systems and Techniques (IST); 2019. Abu Dhabi: IEEE Xplore; 2020.
- 615 23. Sherman H, Castro G, Fletcher M, World Alliance for Patient S, Hatlie M, Hibbert  
616 P, et al. Towards an International Classification for Patient Safety: the conceptual framework.  
617 *Int J Qual Health Care*. 2009;21(1):2-8.

- 618 24. Thomson R, Lewalle P, Sherman H, Hibbert P, Runciman W, Castro G. Towards  
619 an International Classification for Patient Safety: a Delphi survey. *Int J Qual Health Care.*  
620 2009;21(1):9-17.
- 621 25. World Health Organisation. Conceptual Framework for the International  
622 Classification for Patient Safety: Version 1.1. 2009.
- 623 26. Jabin MSR, Pan D, Nilsson E. Characterizing healthcare incidents in Sweden  
624 related to health information technology affecting care management of multiple patients. *Health*  
625 *Inform J.* 2022;28(2):14604582221105440.
- 626 27. Braun V, Clarke V. What can "thematic analysis" offer health and wellbeing  
627 researchers? *International journal of qualitative studies on health and well-being.*  
628 2014;9:26152-.
- 629 28. Jabin MSR, Magrabi F, Hibbert P, Schultz T, Runciman W, editors. Identifying  
630 and Classifying Incidents Related to Health Information Technology in Medical Imaging as a  
631 Basis for Improvements in Practice. 2019 IEEE International Conference on Imaging Systems  
632 and Techniques (IST); 2019. Abu Dhabi: IEEE Xplore; 2020.
- 633 29. The Joint Commission. Moving Quality Improvement from a Project to a Way of  
634 Leading an Organization. *Journal on Quality and Patient Safety.* 2016;42(2).
- 635 30. Australian Commission on Safety and Quality in Health Care. Ensuring Correct  
636 Patient, Correct Site, Correct Procedure Protocol 2014. Available from:  
637 [www.safetyandquality.gov.au/our-work/patient-identification/patient-procedure-](http://www.safetyandquality.gov.au/our-work/patient-identification/patient-procedure-matchingprotocols/expanding-the-3cs-into-other-therapeutic-areas/)  
638 [matchingprotocols/expanding-the-3cs-into-other-therapeutic-areas/](http://www.safetyandquality.gov.au/our-work/patient-identification/patient-procedure-matchingprotocols/expanding-the-3cs-into-other-therapeutic-areas/).
- 639 31. Coiera E, Magrabi F. Information system safety. *Guide to Health Informatics:*  
640 Boca Raton, FL, USA: CRC Press, Taylor & Francis Group; 2015.
- 641 32. Jabin MSR. Identifying and characterising problems arising from interactions  
642 between medical imaging and health information technology as a basis for improvements in  
643 practice. Adelaide: University of South Australia; 2019.
- 644 33. Allnutt MF. Human factors in accidents. *Br J Anaesth.* 1987;59(7):856-64.
- 645 34. Norman D. *The Psychology of Everyday Things:* New York: Basic Books; 1988.
- 646 35. Watson L, Odle TG. The technologist's role in patient safety and quality in  
647 medical imaging. *Radiol Technol.* 2013;84(5):536-41.
- 648 36. Wilbanks BA, Aroke EN. Using Clinical Simulations to Train Healthcare  
649 Professionals to Use Electronic Health Records: A Literature Review. *CIN: Computers,*  
650 *Informatics, Nursing.* 2020;38(11).
- 651 37. Stroup K, Sanders B, Bernstein B, Scherzer L, Pachter LM. A New EHR Training  
652 Curriculum and Assessment for Pediatric Residents. *Appl Clin Inform.* 2017;8(4):994-1002.
- 653 38. Qvarfordt M, Throfast V, Petersson G, Hammar T, Hellström L. Web-based  
654 education of the elderly improves drug utilization literacy: A randomized controlled trial.  
655 *Health Informatics J.* 2021;27(1):1460458220977585.
- 656 39. Vincent C, Davis R. Patients and families as safety experts. *CMAJ : Canadian*  
657 *Medical Association journal = journal de l'Association medicale canadienne.* 2012;184(1):15-  
658 6.
- 659 40. Russ A, Fairbanks R, Karsh B, Militello L, Saleem J, Wears R. The science of  
660 human factors: separating fact from fiction. *BMJ Qual Saf.* 2013 Oct; 22 (10): 802–8. doi:  
661 10.1136/bmjqs-2012-001450.
- 662 41. Melles M, Albayrak A, Goossens R. Innovating health care: key characteristics  
663 of human-centered design. *International Journal for Quality in Health Care.*  
664 2021;33(Supplement\_1):37-44.
- 665 42. Russ AL, Saleem JJ. Ten factors to consider when developing usability scenarios  
666 and tasks for health information technology. *J Biomed Inform.* 2018;78:123-33.



- 667 43. Karsh BT, Holden RJ, Alper SJ, Or CK. A human factors engineering paradigm  
668 for patient safety: designing to support the performance of the healthcare professional. *Qual Saf*  
669 *Health Care*. 2006;15 Suppl 1(Suppl 1):i59-65.
- 670 44. Saleem JJ, Russ AL, Sanderson P, Johnson TR, Zhang J, Sittig DF. Current  
671 challenges and opportunities for better integration of human factors research with development  
672 of clinical information systems. *Yearb Med Inform*. 2009;48-58.
- 673 45. NHS CfH. Common User Interface 2011 [Available from:  
674 <http://www.connectingforhealth.nhs.uk/systemsandservices/data/cui>.  
675
- 676 46. NIST. Evaluation, Testing, and Validation of the Usability of Electronic Health  
677 Records: US National Institute of Standards and Technology (NISTIR 7804). 2012 [Available  
678 from: [http://www.nist.gov/manuscript-publication-search.cfm?pub\\_id=909701](http://www.nist.gov/manuscript-publication-search.cfm?pub_id=909701).  
679
- 680 47. Jabin MSR, Hammar T. Issues with the Swedish e-prescribing system – An  
681 analysis of health information technology-related incident reports using an existing  
682 classification system. *DIGITAL HEALTH*. 2022;8:20552076221131139.
- 683 48. Parasuraman R, Mouloua M, Hillsdale NJ. Automation and human performance:  
684 theory and applications. England: Lawrence Erlbaum Associates; 1996.
- 685 49. Warm D, Edwards P. Classifying health information technology patient safety  
686 related incidents - an approach used in Wales. *Applied clinical informatics*. 2012;3(2):248-57.
- 687 50. Kruse CS, Mileski M, Syal R, MacNeil L, Chabarría E, Basch C. Evaluating the  
688 relationship between health information technology and safer-prescribing in the long-term care  
689 setting: A systematic review. *Technol Health Care*. 2021;29(1):1-14.
- 690 51. Ash JS, Berg M, Coiera E. Some unintended consequences of information  
691 technology in health care: the nature of patient care information system-related errors. *Journal*  
692 *of the American Medical Informatics Association : JAMIA*. 2004;11(2):104-12.
- 693 52. Park SY, Lee SY, Chen Y. The effects of EMR deployment on doctors' work  
694 practices: a qualitative study in the emergency department of a teaching hospital. *Int J Med*  
695 *Inform*. 2012;81(3):204-17.
- 696 53. Taib IA, McIntosh AS, Caponecchia C, Baysari MT. A review of medical error  
697 taxonomies: A human factors perspective. *Safety Science*. 2011;49(5):607-15.
- 698 54. Jabin MSR, Steen M, Wepa D, Bergman P. Assessing the healthcare quality issues  
699 for digital incident reporting in Sweden: Incident reports analysis. *DIGITAL HEALTH*.  
700 2023;9:20552076231174307.
- 701 55. Magrabi F, Liaw ST, Arachi D, Runciman W, Coiera E, Kidd MR. Identifying  
702 patient safety problems associated with information technology in general practice: an analysis  
of incident reports. *BMJ Qual Saf*. 2015.
